# Supplementary material
Source: HighWire-hosted journal article supplement (https://hw-f5-jim.highwire.org/content/jim-2021-002274)
Supplement: inline-supplementary-material-1 [file inline-supplementary-material-1.pdf]

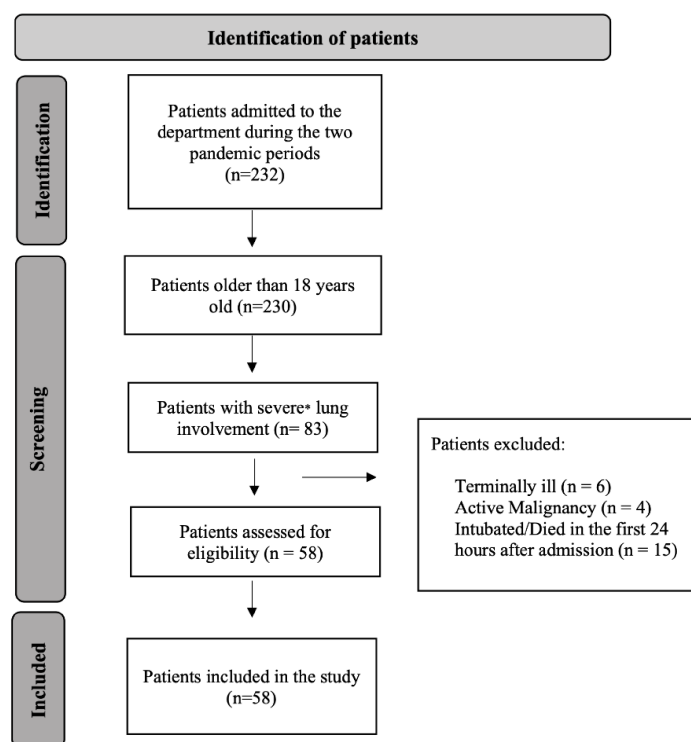

\*SpO<sub>2</sub>/FiO<sub>2</sub> < 300 and a CT scan with bilateral and over 50% of the lung parenchyma distribution of opacities, either ground glass or consolidated

**Supplementary Figure 1.** Flow chart showing the process of patient registration.

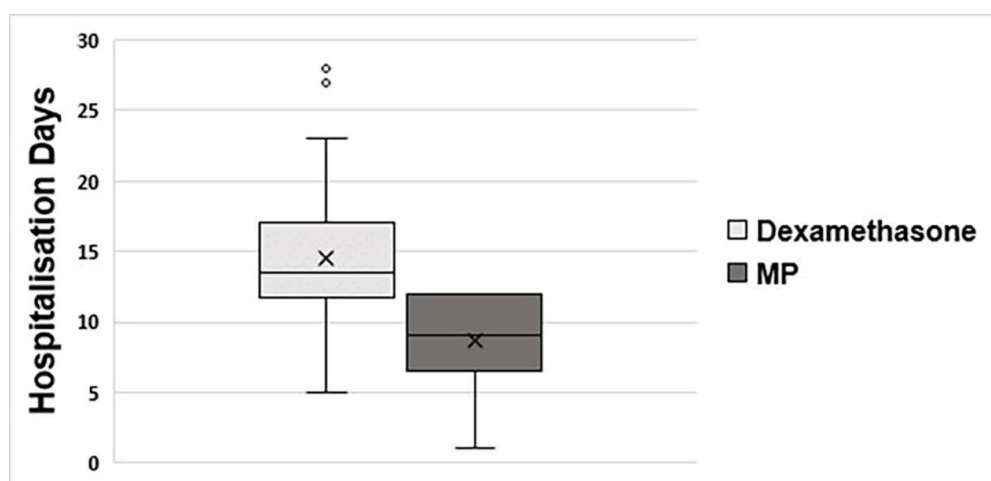

**Supplementary Figure 2.** Hospitalisation days required for patients who were not intubated, on the basis of the treatment protocol they received.

**Supplementary Table 1.** Immunophenotype characteristics of patients with severe COVID during the two different pandemic periods in Greece.

| Characteristics    | Pulses             |                   | p-value |
|--------------------|--------------------|-------------------|---------|
|                    | Treatment with SOC | Treatment with MP |         |
|                    | Median (IQR)       |                   |         |
| <b>CD4/CD8</b>     | 2.04 (1.45)        | 2.15 (1.2)        | 0.75    |
| <b>CD4 %</b>       | 39.4 (15.7)        | 42 (25)           | 0.41    |
| <b>CD4 cells</b>   | 297 (214)          | 145 (140)         | 0.05    |
| <b>CD8 %</b>       | 21.7 (14)          | 16 (9)            | 0.31    |
| <b>CD8 cells</b>   | 142 (64)           | 58.5 (89)         | <0.01   |
| <b>NK %</b>        | 23 (15)            | 13.4 (15)         | 0.15    |
| <b>NK cells</b>    | 141 (221)          | 79 (103)          | 0.01    |
| <b>CD 19 %</b>     | 11 (9)             | 4.34 (6.7)        | <0.01   |
| <b>CD 19 cells</b> | 70 (94)            | 20 (33)           | <0.01   |
| <b>IgG</b>         | 1135 (338)         | 1095 (372)        | 0.81    |
| <b>IgM</b>         | 100 (61)           | 69 (56)           | 0.38    |
| <b>IgA</b>         | 295 (95)           | 173 (226)         | 0.14    |
